# Supplementary material for: Doping in Recreational Sport as a Risk Management Strategy
Source: MDPI journal article supplement (doi:10.3390/jrfm15120574), 2022-12-02
Supplement: s1 [file s1]

## Supplement

**Table S1.** Best estimates and confidence intervals for the prevalence of doping by level of competition

| Level of competition participation |            | Best estimate | Confidence interval |       |
|------------------------------------|------------|---------------|---------------------|-------|
|                                    |            |               | Lower               | Upper |
| International level<br>n = 210     | Honest yes | 0             | ---                 | ---   |
|                                    | INC        | 9.2           | 0.0                 | 40.6  |
|                                    | Honest no  | 90.8          | 66.3                | 100.0 |
| National level<br>n = 743          | Honest yes | 5.9           | 0.0                 | 15.1  |
|                                    | INC        | 59.5          | 46.1                | 72.7  |
|                                    | Honest no  | 34.6          | 16.5                | 49.7  |
| Regional level<br>n = 911          | Honest yes | 1.3           | 0.0                 | 9.6   |
|                                    | INC        | 11.2          | 0.0                 | 38.4  |
|                                    | Honest no  | 87.5          | 575.9               | 100.0 |
| Local level<br>n = 998             | Honest yes | 0.0           | ---                 | ---   |
|                                    | INC        | 24.3          | 2.9                 | 36.7  |
|                                    | Honest no  | 75.7          | 62.7                | 97.5  |

**Table S2.** Best estimates and confidence intervals for the prevalence of doping by level of competition

| Relative duration of playing sport |            | Best estimate | Confidence interval |       |
|------------------------------------|------------|---------------|---------------------|-------|
|                                    |            |               | Lower               | Upper |
| Up to median<br>n = 2091           | Honest yes | 0             | ---                 | ---   |
|                                    | INC        | 18.3          | 5.5                 | 27.6  |
|                                    | Honest no  | 81.7          | 71.3                | 100.0 |
| Above median<br>n = 2149           | Honest yes | 9.4           | 1.3                 | 24.9  |
|                                    | INC        | 38.2          | 21.2                | 54.5  |
|                                    | Honest no  | 52.4          | 28.8                | 72.8  |

**Table S3.** Best estimates and confidence intervals for the prevalence of doping by level of competition

|                                    |            | Best estimate | Confidence interval |       |
|------------------------------------|------------|---------------|---------------------|-------|
|                                    |            |               | Lower               | Upper |
| Non-competing athletes<br>n = 1363 | Honest yes | 6.9           | 0                   | 23.2  |
|                                    | INC        | 29.0          | 8.6                 | 37.6  |
|                                    | Honest no  | 64.1          | 38.6                | 88.8  |
| Competing athletes<br>n = 2830     | Honest yes | 0.8           | 0                   | 6.7   |
|                                    | INC        | 23.3          | 10.3                | 37.6  |
|                                    | Honest no  | 75.9          | 59.9                | 90.1  |
